# Supplementary material for: Exosomal Wnt7a from a low metastatic subclone promotes lung metastasis of a highly metastatic subclone in the murine 4t1 breast cancer
Source: Springer Nature journal article supplement (doi:10.1186/s13058-022-01557-5), 2022-09-12
Supplement: MOESM1 [file 23478484]

## Supplementary Information

### **Exosomal Wnt7a from a Low Metastatic Subclone Promotes Lung Metastasis of a Highly Metastatic Subclone in the Murine 4T1 Breast Cancer**

Chunning Li<sup>1</sup>, Teizo Yoshimura<sup>1\*</sup>, Miao Tian<sup>1</sup>, Yuze Wang<sup>1</sup>, Takamasa Kondo<sup>1</sup>, Ken-Ichi Yamamoto<sup>2</sup>, Masayoshi Fujisawa<sup>1</sup>, Toshiaki Ohara<sup>1</sup>, Masakiyo Sakaguchi<sup>2</sup> and Akihiro Matsukawa<sup>1\*</sup>

<sup>1</sup>Department of Pathology and Experimental Medicine, <sup>2</sup>Department of Cell Biology, Graduate School of Medicine, Dentistry and Pharmaceutical Sciences, Okayama University, 2-5-1 Shikata, Kita-ku, Okayama 700-8558, Japan.

**Table S1. Antibodies used in this study**

| <b>Western blot</b>                         |           |                     |
|---------------------------------------------|-----------|---------------------|
| <b>Primary antibody</b>                     |           |                     |
| Protein name                                | Dilution  | Company             |
| CD63                                        | 1:1000    | Abcam #ab217345     |
| TSG101                                      | 1:1000    | Abcam #ab125011     |
| GM130                                       | 1:500     | BD #610822          |
| $\beta$ -catenin                            | 1:1000    | CST #8480           |
| Wnt7a                                       | 1:1000    | Abcam #ab100792     |
| c-Myc                                       | 1:1000    | CST #5605           |
| p70S6K                                      | 1:1000    | CST #9202           |
| Phospho-p70S6K                              | 1:1000    | CST #9234           |
| Snail                                       | 1:1000    | CST #3879           |
| AKT                                         | 1:1000    | CST #4691           |
| Phospho-AKT                                 | 1:1000    | CST #9271           |
| Rab27a                                      | 1:1000    | CST #69295          |
| $\alpha$ SMA                                | 1:200     | Dako #M0851         |
| E-cadherin                                  | 1:1000    | CST #3195           |
| $\beta$ -actin                              | 1:5000    | Sigma #A5441        |
| GAPDH                                       | 1:5000    | CST #5174           |
| <b>Secondary antibody</b>                   |           |                     |
| Goat anti-rabbit IgG HRP                    | 1:2000    | CST #7074           |
| Goat anti-mouse IgG HRP                     | 1:2000    | CST #91196          |
| <b>Immunohistochemistry</b>                 |           |                     |
| $\alpha$ SMA                                | 1:200     | Dako #M0851         |
| ERG                                         | Undiluted | Nichirei #418111    |
| CD31                                        | 1:2000    | #ab182981           |
| <b>Secondary antibody</b>                   |           |                     |
| Goat anti-rabbit IgG HRP                    | Undiluted | Nichirei #414341    |
| Polink-2 Plus HRP anti Mouse Detection Kit  | Undiluted | GBI Labs #D37-18    |
| <b>Immunofluorescence</b>                   |           |                     |
| $\beta$ -catenin                            | 1:3000    | CST #19807          |
| <b>Secondary antibody</b>                   |           |                     |
| Alexa Fluor™ 488 goat anti-rabbit IgG (H+L) | 1:400     | Invitrogen #A-11008 |

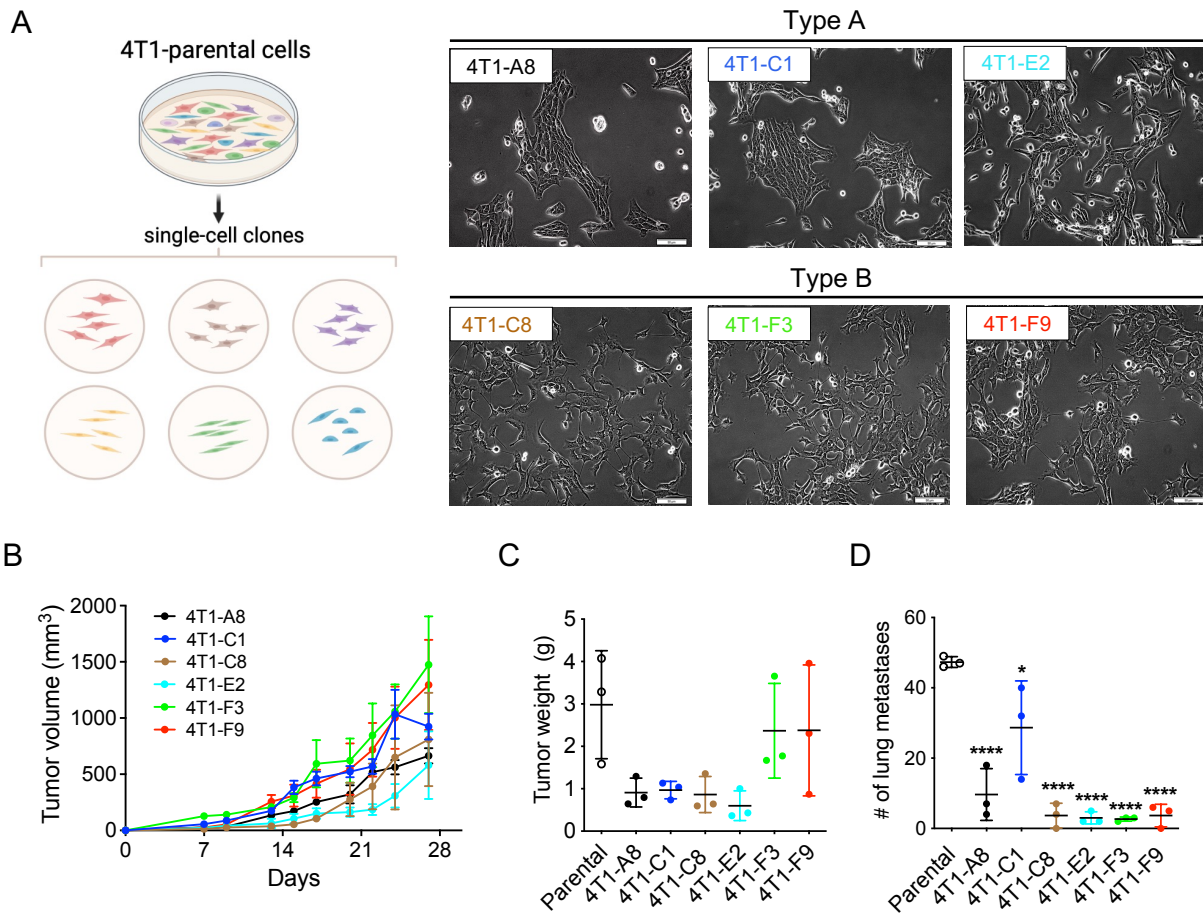

**Figure S1. Six single cell clones isolated from parental 4T1 cells show different metastatic potential.** (A) The cellular morphology of single-cell clones derived from original 4T1 cells by one round of limiting dilution. The scale bar indicates 50  $\mu\text{m}$ . (B) One hundred thousand subclone cells were transplanted into the 3rd mammary pad of BALB/c mice. The size of each tumor was measured for 4 weeks and tumor volume was calculated. The results are presented as the mean  $\pm$  SEM. Statistical significance was analyzed by one-way ANOVA with multiple comparisons.  $n = 3$ . (C) Mice were euthanized 4 weeks after the injection, and tumor weight was measured. The results are presented as the mean  $\pm$  SEM. Statistical significance was analyzed by one-way ANOVA with multiple comparisons.  $n = 3$ . (D) The number of metastases in the lungs was counted. The results are presented as the mean  $\pm$  SEM. Statistical significance was analyzed by one-way ANOVA with multiple comparisons. \* $p < 0.05$ , \*\*\*\* $p < 0.0001$ ,  $n = 3$ .

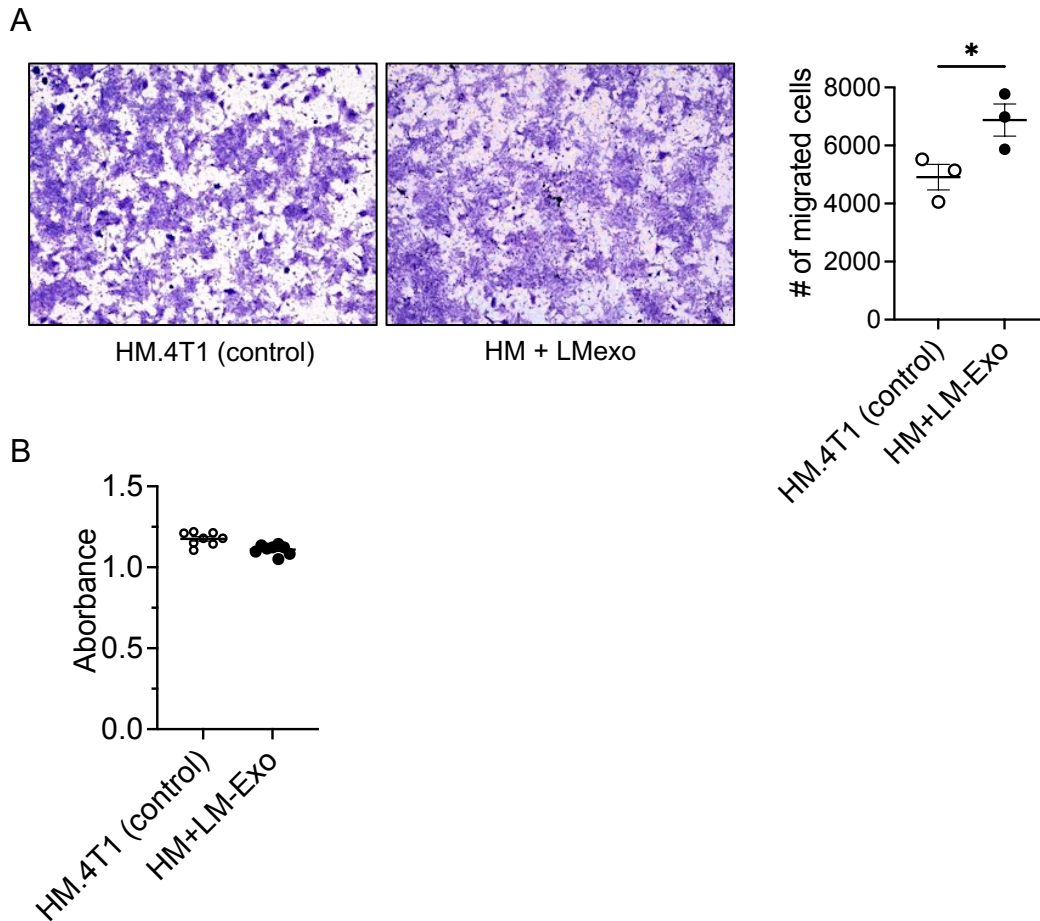

**Figure S2. Exosomes from LM.4T1 cells enhance the migration, but not the proliferation, of HM.4T1 cells.** (A) Transwell migration assay was performed using 24-well inserts with 8- $\mu$ m pore size (Corning Costar Corp., Corning, NY, USA). HM.4T1 cells suspended in 200  $\mu$ l of serum-free culture medium were loaded into the inner wells. Exosomes (10 $\mu$ g) isolated from LM.4T1 cells or the same volume of PBS were added to the inner wells. Six hundred  $\mu$ l of culture medium containing 20% FBS was added to the outer wells. After 48 hours, cells on the lower surface of the chamber were fixed with 4% paraformaldehyde for 20 min. After washing 3 times with PBS, the membranes were stained with the Diff Quik Staining kit and photographed under the microscope. The number of migrated cells were counted by using the Image J software. Photos (left panel) and quantitative data (right panel) are presented.  $n = 3$ .  $*p < 0.05$ . (B) Twenty thousand HM.4T1 cells were suspended in 1 ml of culture medium that contained a same volume of PBS or LM.4T1 derived exosomes (5  $\mu$ g), and then  $2 \times 10^3$  cells were seeded into each well of a 96-well plate. After 4 days of culture, 10  $\mu$ l of MTT labeling reagent (Roche) was added to each well. After a 4-hour incubation in a humidified environment, 100  $\mu$ l of the solubilization solution (Roche) was added to each well. Plate was allowed to stand overnight in an incubator in a humidified atmosphere (37°C, 5% CO<sub>2</sub>). After complete solubilization of the purple formazan crystals, the spectrophotometrical absorbance of the samples was measured using a microplate reader. The wavelength to measure the absorbance of the formazan product was between 570 and 690 nm.  $n = 8$ .

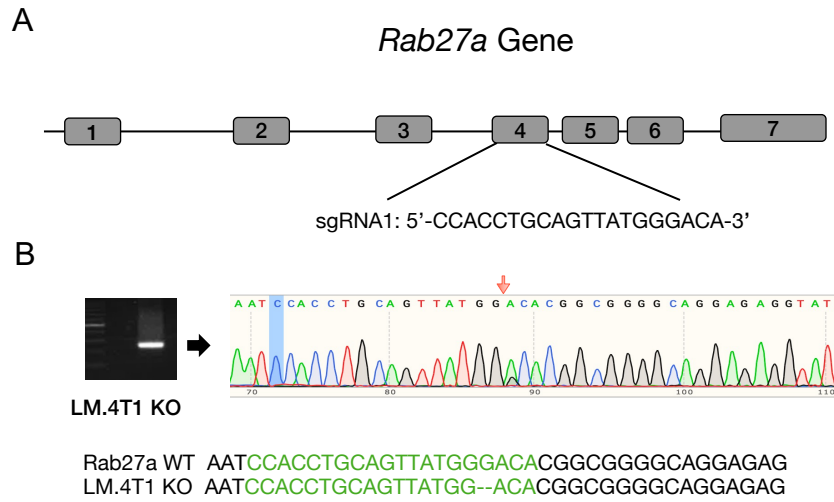

**Figure S3. Establishment of stable *Rab27a* (-) cells by using the CRISPR-Cas9 system.** **A.** The figure illustrates the structure of the mouse *Rab27a* gene, and the guide RNA sequence used to target the fourth exon. **B.** The targeted region was amplified by PCR using genomic DNA isolated from each clone, gel purified and sequenced. The arrow indicates a loss of G in the genomic DNA of LM-*Rab27a* (-) cells.

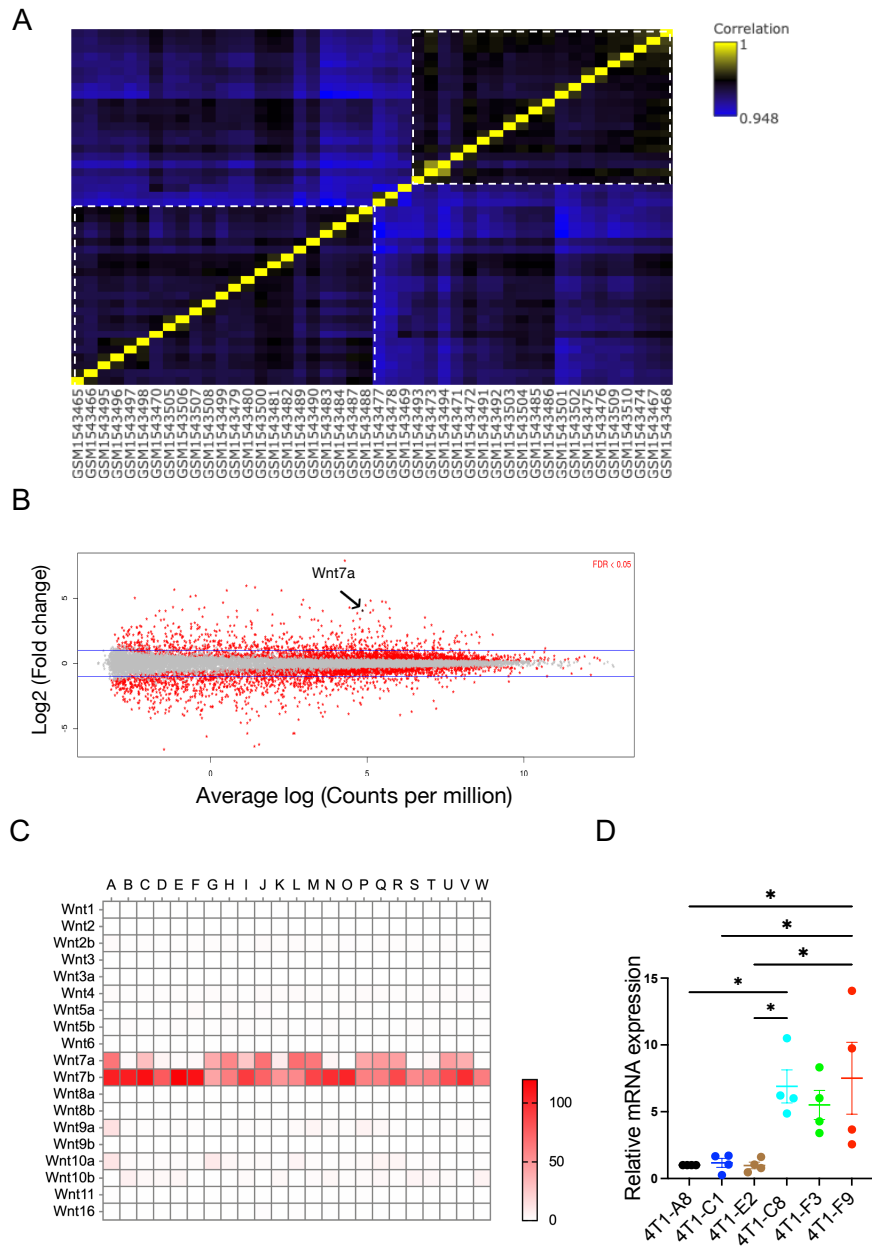

**Figure S4. The classification analysis of previously reported 4T1 clonal populations using the GEO RNA-seq Experiments Interactive Navigator (GREIN).** (A) A correlation matrix was created using the RNA sequencing data (ID: GSE63180) of 23 subclones isolated from parental 4T1 cells [20]. Two boxes indicate that 23 4T1 subclones could be separated into two subgroups based on the gene expression profile. (B) Analysis using the MA plot (log-fold change vs. log-average expression) indicates different gene expression profiles between the two subgroups. False discovery rate (FDR) < 0.05. The arrow points the *Wnt7a* gene. (C) The expression levels of genes belonging to the Wnt family by the 23 4T1 subclones are shown by a heatmap. (D) The expression of *Wnt7a* mRNA in 6 subclones that we isolated from parental 4T1 cells (presented in Figure S1). The results are presented as the mean  $\pm$  SE. Statistical significance was examined by ordinary one-way ANOVA with multiple comparisons.  $n = 4$ . \* $p < 0.05$ , \*\* $p < 0.01$ .

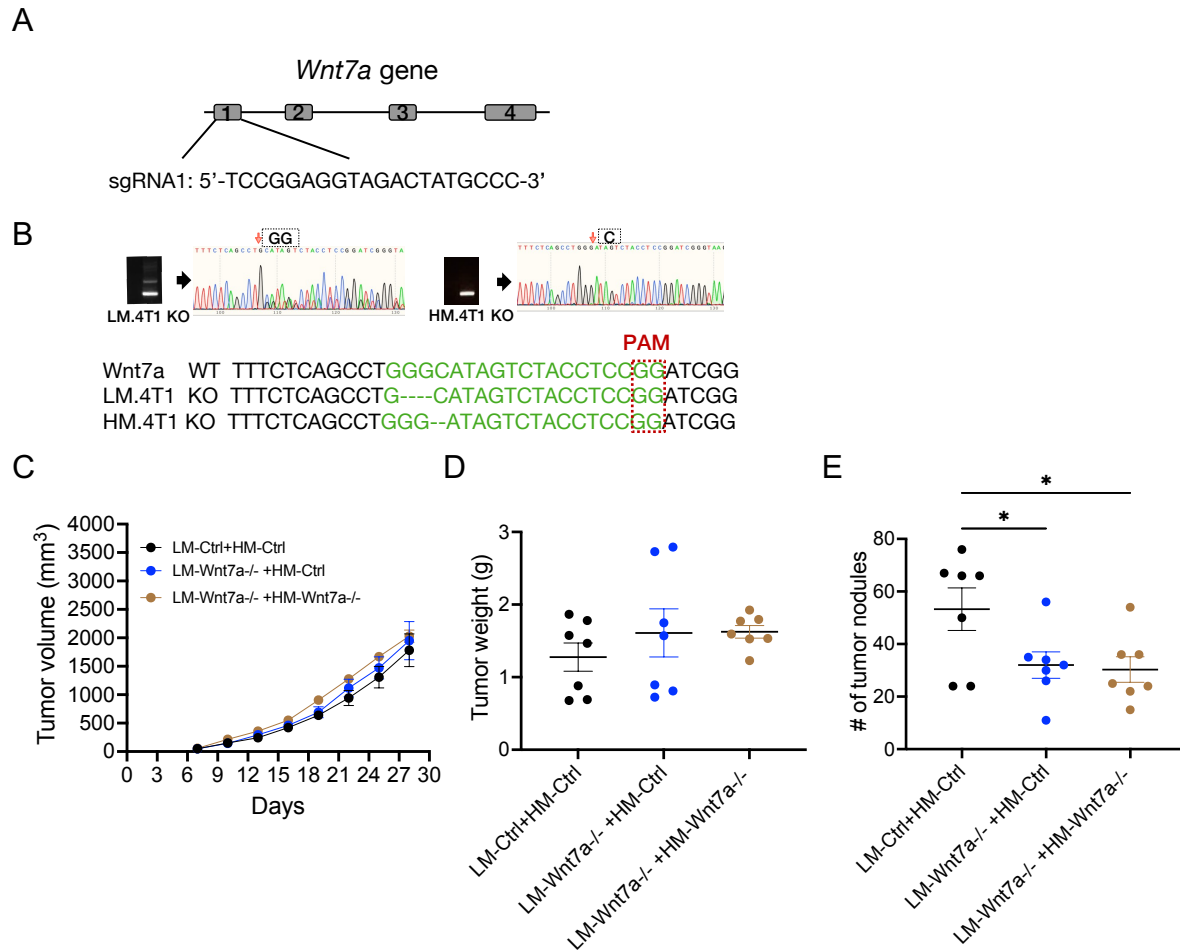

**Figure S5. Deletion of *Wnt7a* in LM.4T1 abrogates the increased HM.4T1 lung metastasis caused by co-injection of LM.4T1 cells.** (A) The figure illustrates the structure of the mouse *Wnt7a* gene, and the guide RNA sequence used to target the first exon. (B) The targeted region was amplified by PCR using genomic DNA isolated from each clone, gel purified and sequenced. In LM-Wnt7a (-) cells, two G are deleted whereas C is deleted in HM-Wnt7a (-) cells. (C) 1:1 cell mixture of LM-Ctrl and HM-Ctrl, LM-Wnt7a (-) and HM-Ctrl, and LM-Wnt7a (-) and HM-Wnt7a (-) cells in a total of  $1 \times 10^5$  cells were inoculated into the 3rd mammary pad of BALB/c nude mice. Tumor size was monitored for 28 days, and tumor volume was calculated. The results are presented as the mean  $\pm$  SEM. Statistical significance was examined by ordinary one-way ANOVA with multiple comparisons.  $n = 7$ . (D) Four weeks after tumor cell inoculation, mice were euthanized, and the weight of each tumor was measured. The results are presented as the mean  $\pm$  SEM. Statistical significance was examined by ordinary one-way ANOVA with multiple comparisons.  $n = 7$ . (E) The number of metastases in the lung was counted. The results are presented as the mean  $\pm$  SEM. Statistical significance was examined by ordinary one-way ANOVA with multiple comparisons.  $*p < 0.05$ ,  $n = 7$ .

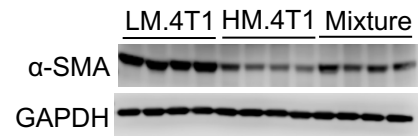

**Figure S6. The level of  $\alpha$ -SMA is lower in HM.4T1 tumors.** Tumor extracts were prepared from tumors of LM.4T1 cells, HM.4T1 cells or cell mixture two weeks after tumor cell inoculation, and the level of  $\alpha$ -SMA was examined by western blotting.



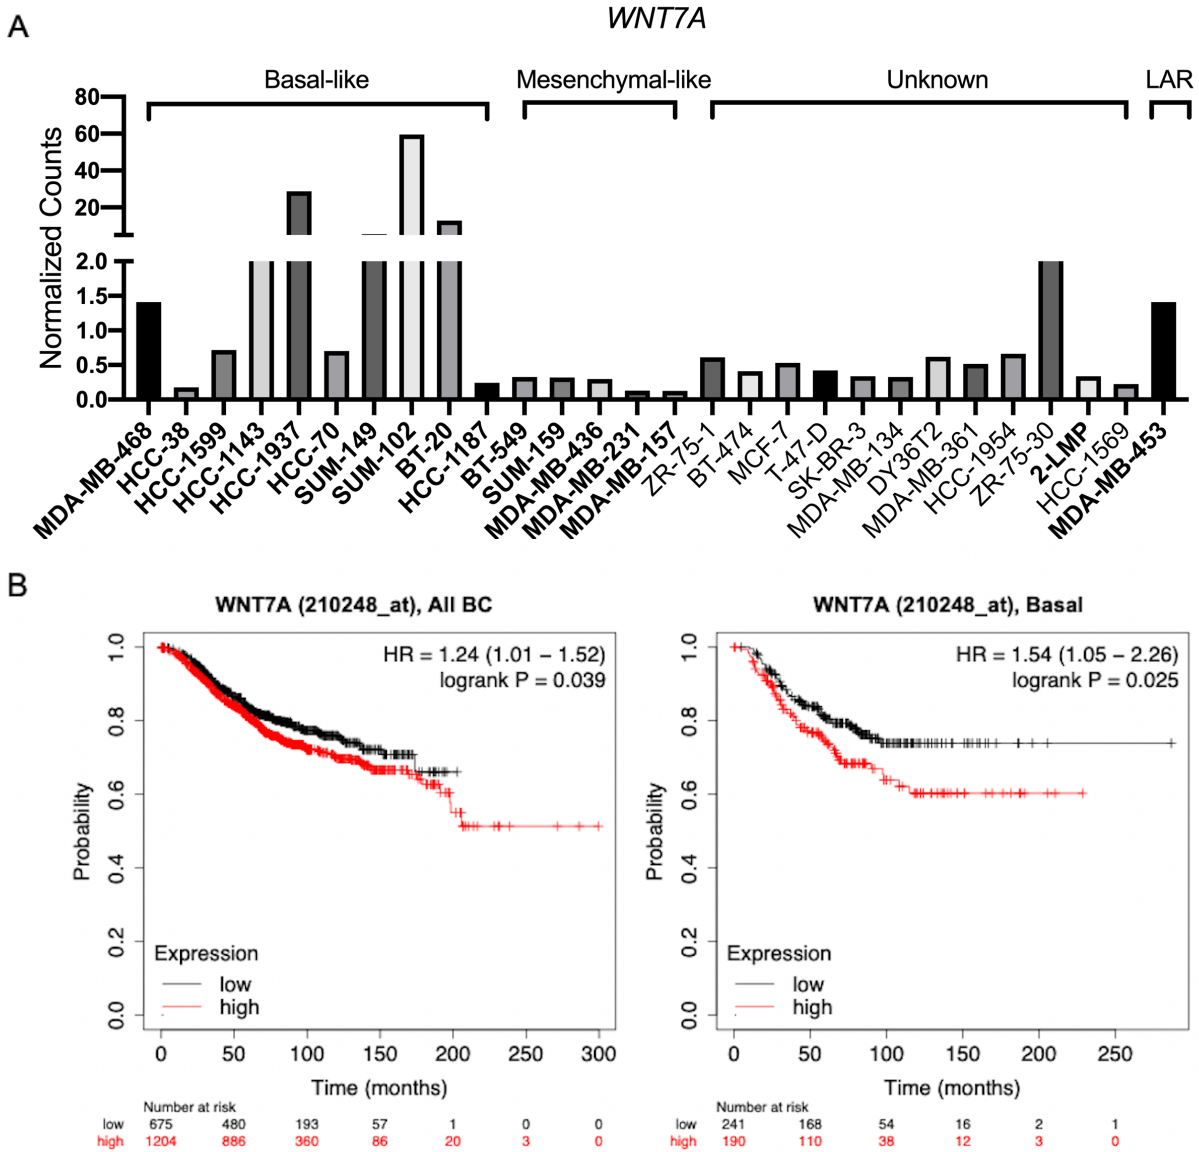

**Figure S7. The expression of *WNT7* mRNA in human BC cell lines and an association of *WNT7A* mRNA and the prognosis of patients in six subtypes of TNBC. A.** Expression plot. RNA sequencing data of 28 human breast cancer cell lines (10 basal-like, 5 mesenchymal, 12 unknown and 1 LAR) was obtained from the GEO database (ID: GSE58135) and the expression levels of *WNT7A* mRNA were analyzed by using the GREIN [69]. Cell lines indicated by bold letters are TNBC cell lines. **B.** Kaplan-Meier curves generated with the microarray data show that high *WNT7A* mRNA expression in BC, including the Basal-like subtype assigned by PAM50, was associated with poor overall survival (OS) ( $p = 0.039$  and  $p = 0.025$ ). The plots were generated at <https://kmplot.com/analysis/>. An auto-cut off was used.
